# Supplementary material for: F,N-Doped carbon dots as efficient Type I photosensitizers for photodynamic therapy
Source: Royal Society of Chemistry journal article supplement (doi:10.1039/d1dt03788a), 2022-01-01
Supplement: d1dt03788a1.pdf [file d1dt03788a1.pdf]

## Supporting Information *for*

### **F,N-doped carbon dot as an efficient Type I photosensitizer for photodynamic therapy**

Xiaoyan Wu,<sup>‡a</sup> Mingsheng Xu,<sup>‡a</sup> Shuna Wang,<sup>a</sup> Khurram Abbas,<sup>a</sup> Xin Huang,<sup>c</sup> Renquan Zhang,<sup>c</sup> Antonio Claudio Tedesco,<sup>ad</sup> and Hong Bi<sup>\*ab</sup>

*<sup>a</sup>School of Chemistry and Chemical Engineering, Anhui University, Hefei 230601, China.*

*<sup>b</sup>School of Materials Science and Engineering, Anhui University, Hefei 230601, China.*

*<sup>c</sup>Department of Thoracic Surgery, First Affiliated Hospital of Anhui Medical University, Hefei 230032, China.*

*<sup>d</sup>Department of Chemistry, Center of Nanotechnology and Tissue Engineering-Photobiology and Photomedicine Research Group, Faculty of Philosophy, Sciences and Letters of Ribeirão Preto, University of São Paulo, Ribeirão Preto, São Paulo 14040-901, Brazil.*

*\*Corresponding Author*

*\*H. Bi. Tel/Fax: +86 551 63861279.*

E-mail: [bihong@ahu.edu.cn](mailto:bihong@ahu.edu.cn).

<sup>‡</sup> Xiaoyan Wu and Mingsheng Xu contributed equally to this work.

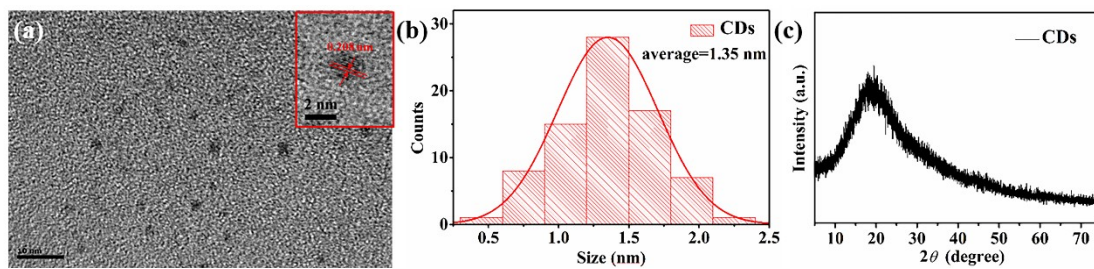

**Fig. S1** (a) A typical TEM image (inset: HRTEM image) and (b) particle size distribution of the CDs. (c) XRD pattern of the CDs.

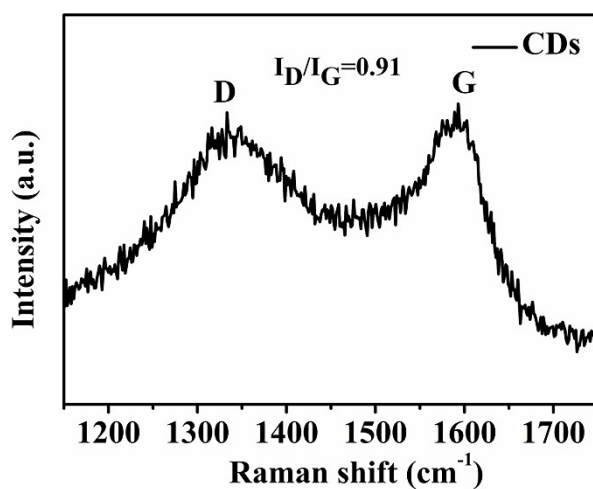

**Fig. S2** Raman spectrum of the CDs (excited by a 750 nm laser).

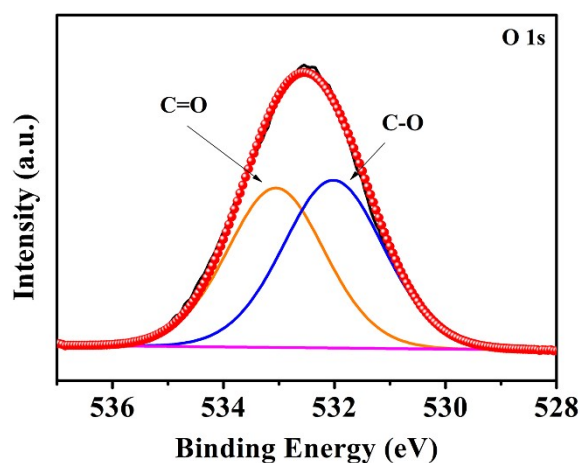

**Fig. S3** High-resolution XPS O 1s spectrum of the F,NCDs.

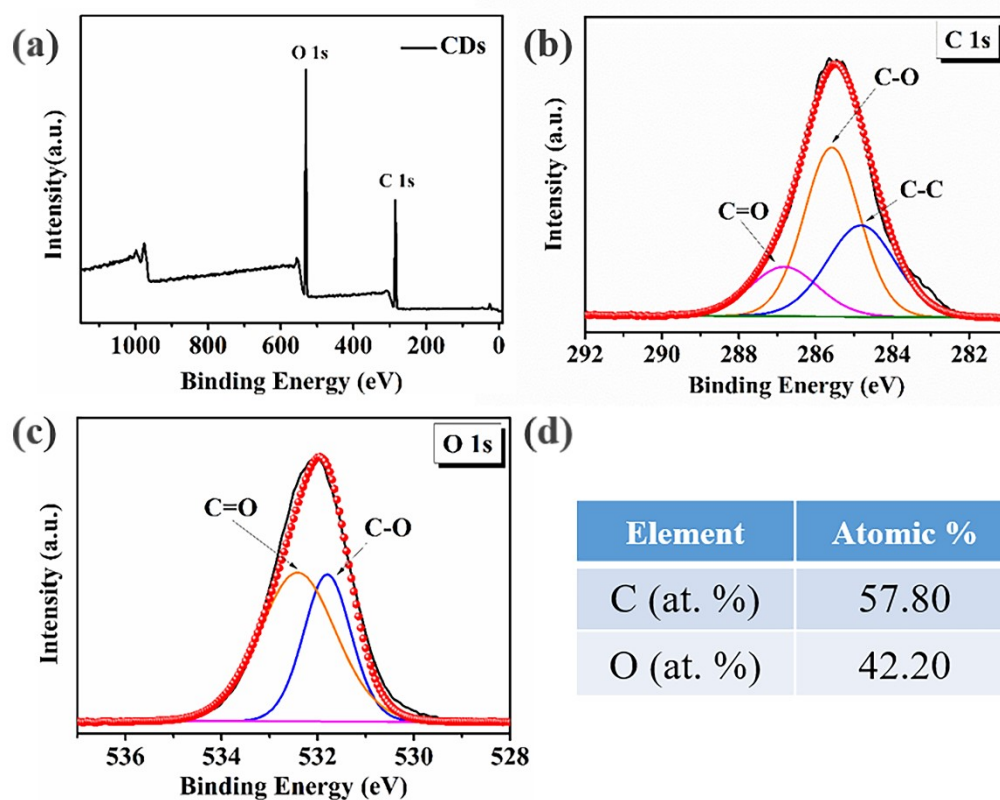

**Fig. S4** (a) XPS survey spectrum of the control sample of CDs. High resolution (b) C 1s and (c) O 1s spectra of the the control sample of CDs. (d) The elemental content of the the control sample of CDs.

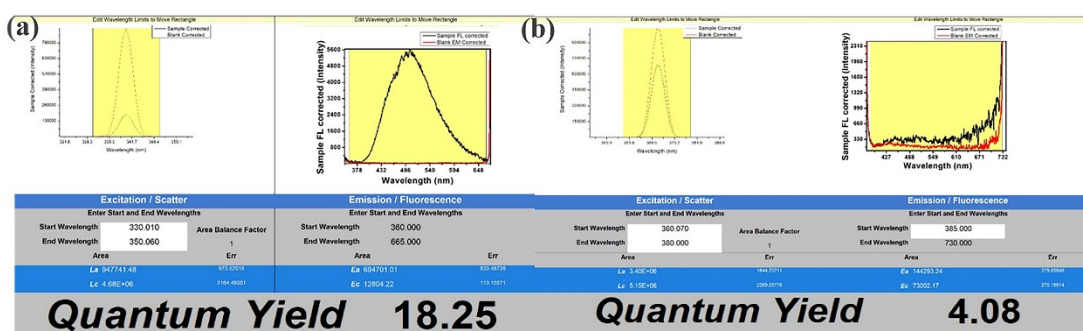

**Fig. S5** Absolute fluorescence quantum yields of the (a) F,NCDs and (b) CDs.

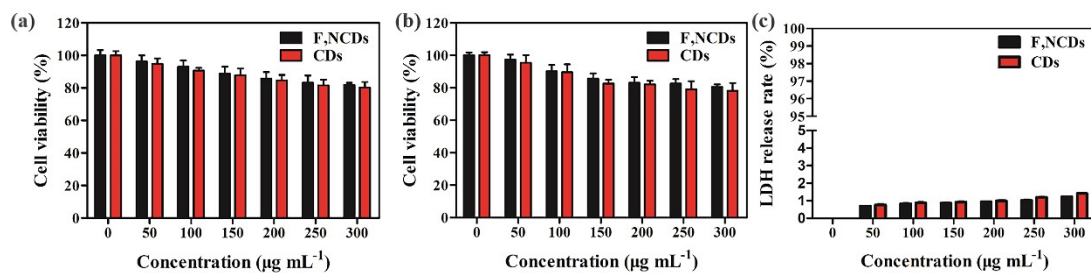

**Fig. S6** (a) MTT results of HepG2 cells (a) and HUVEC cells (b) co-cultured with different concentrations of the F,NCDs and CDs for 24 h. (c) LDH release rate of HepG2 cells after co-incubation with the F,NCDs and CDs for 24 h at the different concentrations, respectively. Each group of experiments was repeated three times.

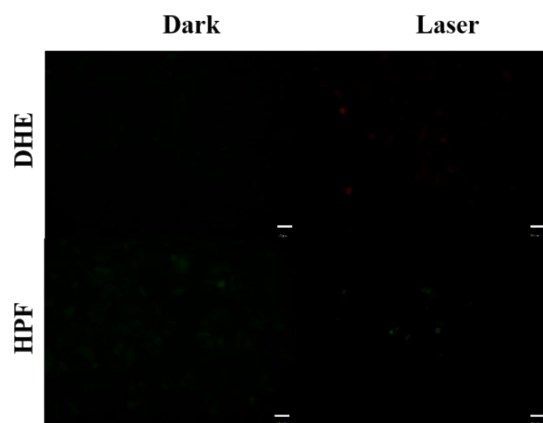

**Fig. S7** Microscopy images of the CDs-treated HepG2 cells in dark or under a LED laser, using DHE and HPF as probes, respectively. Scale bar = 50  $\mu\text{m}$ .

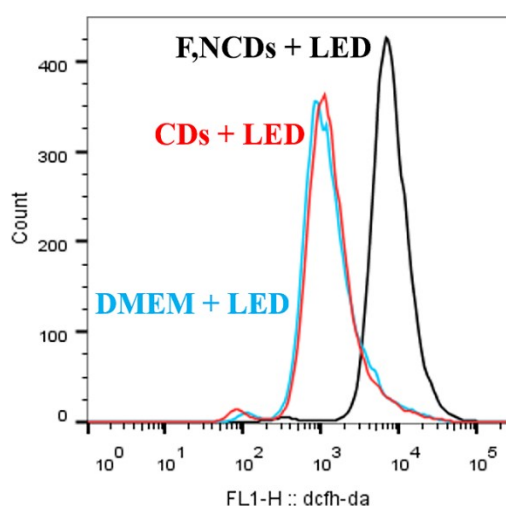

**Fig. S8** HepG2 cells were co-cultured with DMEM, 250  $\mu\text{g mL}^{-1}$  F,NCDs, and 250  $\mu\text{g mL}^{-1}$  CDs, respectively. After being irradiated with LED light for 12 min, the fluorescence intensity of DCFH-DA in cells changed.
